# Supplementary material for: Crystallographically altered (Mg,Sr) 3 (Al,Ga) 2 GeO 8 :Cr 3+ phosphors with tuned emission width from the ultra-sharp red to profound NIR band
Source: Royal Society of Chemistry journal article supplement (doi:10.1039/d5tc03504j), 2026-01-01
Supplement: d5tc03504j1.pdf [file d5tc03504j1.pdf]

## Supporting information

### **Crystallographically altered (Mg, Sr)<sub>3</sub>(Al, Ga)<sub>2</sub>GeO<sub>8</sub>: Cr<sup>3+</sup> phosphors with tuned emission width from ultra-sharp red to profound NIR band**

Thejas K.K.,<sup>1, 3</sup> Vishnu Priya Murali,<sup>2,4</sup> Meenu G.,<sup>1,3</sup> Kaustabh Kumar Maiti,<sup>2,3, \*</sup>

Subrata Das<sup>1,3,\*</sup>

<sup>1</sup> Materials Science and Technology Division, CSIR-National Institute for  
Interdisciplinary Science and Technology, Thiruvananthapuram, Kerala-  
695019, India

<sup>2</sup> Chemical Sciences and Technology Division, CSIR-National Institute for  
Interdisciplinary Science and Technology, Thiruvananthapuram, Kerala-  
695019, India

<sup>3</sup> Academy of Scientific and Innovative Research (AcSIR), Ghaziabad-201002,  
India

<sup>4</sup> Amala Integrated Medical Research Department (AIMRD), Amala Institute of  
Medical Sciences, Thrissur, Kerala - 680 555

**\*E-mails:** [subratadas@niist.res.in](mailto:subratadas@niist.res.in) (SD); [kkmaiti@niist.res.in](mailto:kkmaiti@niist.res.in) (KKM)

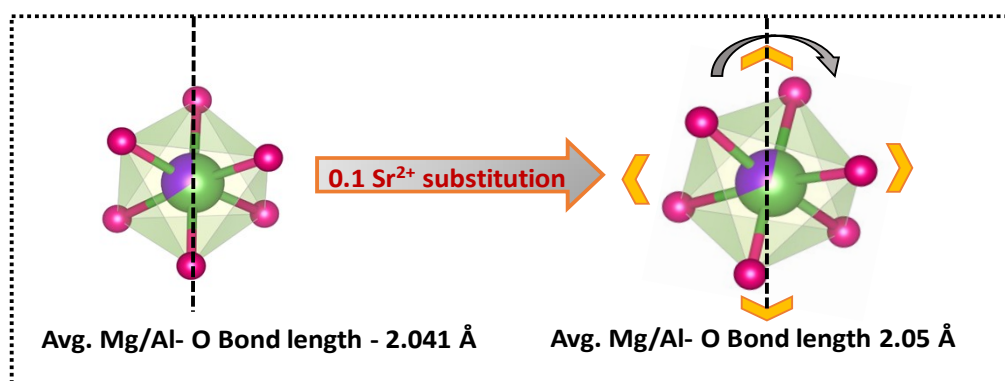

**Figure S1.** Schematic representation of structural distortion in  $[(\text{Mg}/\text{Al})\text{O}_6]$  octahedrons after  $\text{Sr}^{2+}$  ions' doping

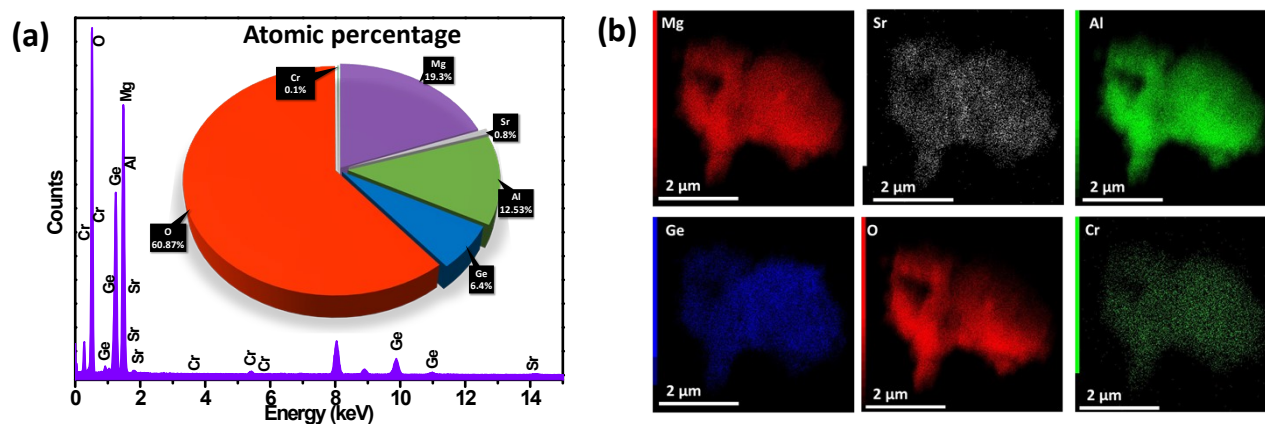

**Figure S2.** (a) The EDX spectra and (b) EDX elemental mapping of Mg, Sr, Al, Ge, O and Cr for MAG:  $\text{Cr}^{3+}$ ,  $0.1\text{Sr}^{2+}$  sample.

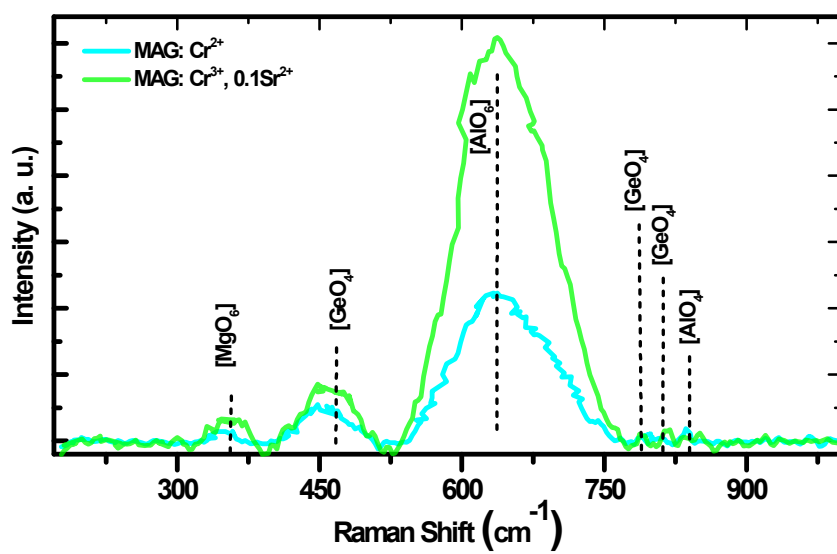

**Figure S3.** Raman spectra of MAG:  $\text{Cr}^{3+}$  and MAG:  $\text{Cr}^{3+}, 0.1\text{Sr}^{2+}$

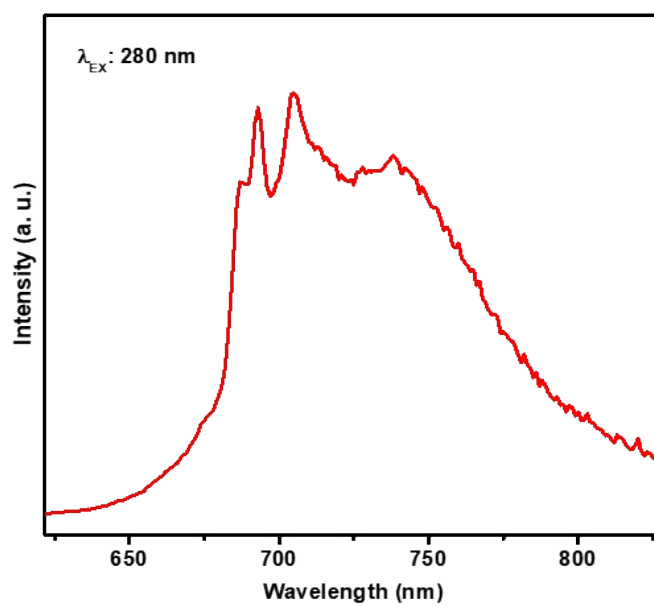

**Figure S4.** PL emission spectra of MAG:  $\text{Cr}^{3+}$  sample for under 280 nm excitation.

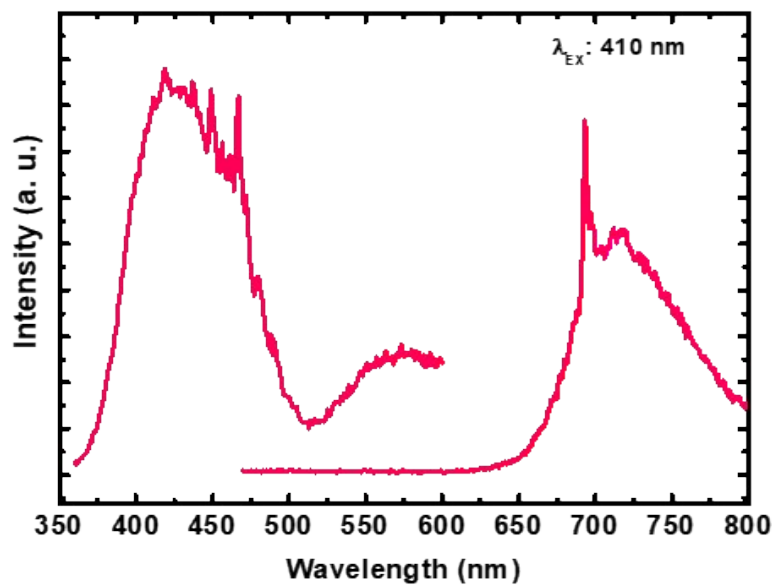

**Figure S5:** PLE and PL emission spectra of  $\text{SrMgGe}_2\text{O}_6: 0.01 \text{ Cr}^{3+}$  sample.

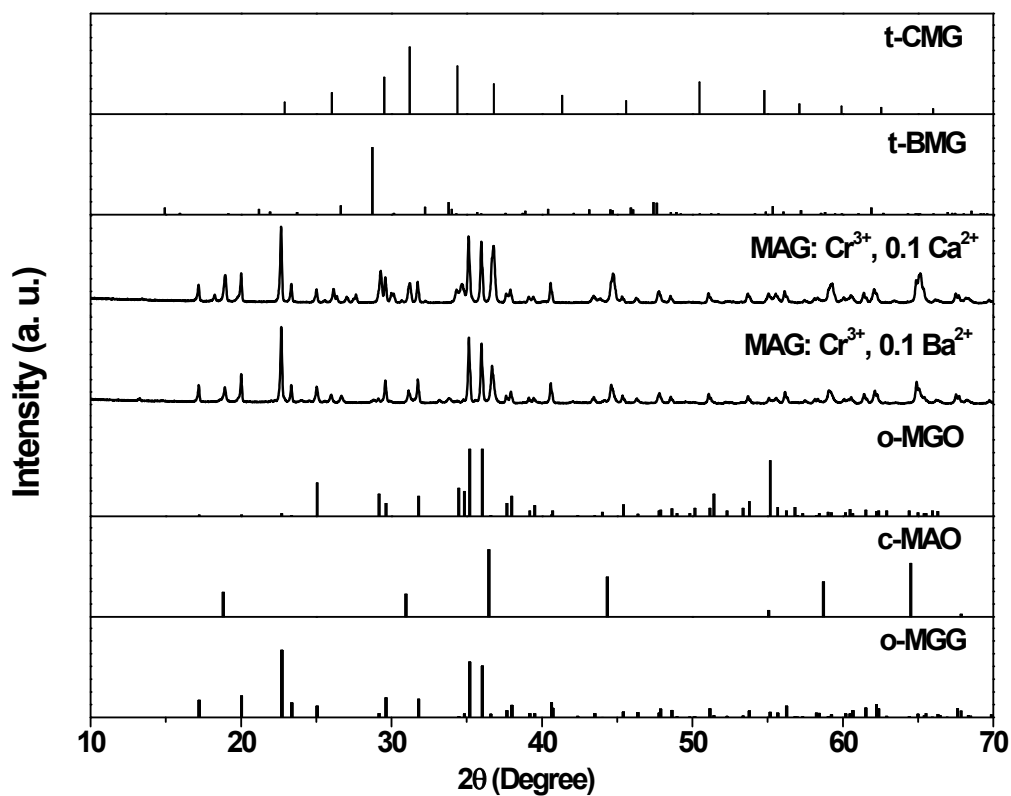

**Figure S6.** XRD patterns of the  $\text{MAG: Cr}^{3+}, 0.1\text{Ba}^{2+}$  and  $\text{MAG: Cr}^{3+}, 0.1\text{Ca}^{2+}$

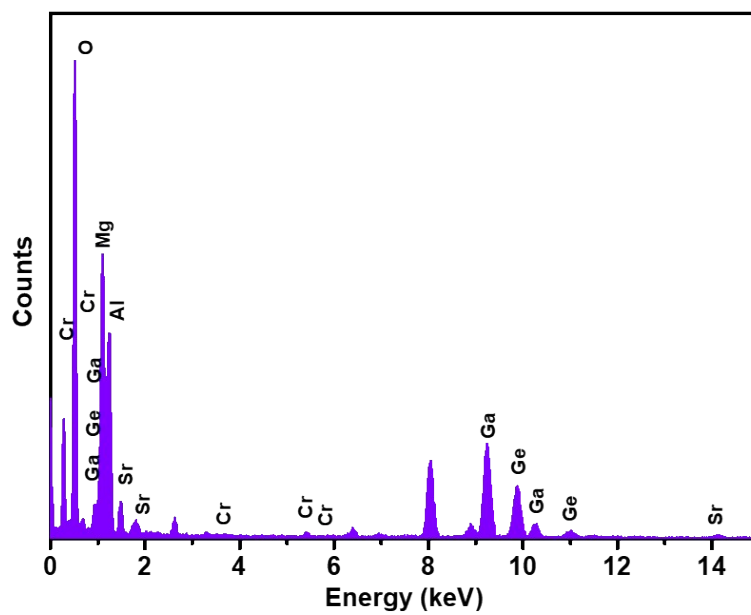

**Figure S7.** The EDX spectra of MAG: Cr<sup>3+</sup>, 1.5 Ga<sup>3+</sup>, 0.1Sr<sup>2+</sup> sample showing the presence of Mg, Al, Ge, Ga, Sr and Cr elements in the sample.

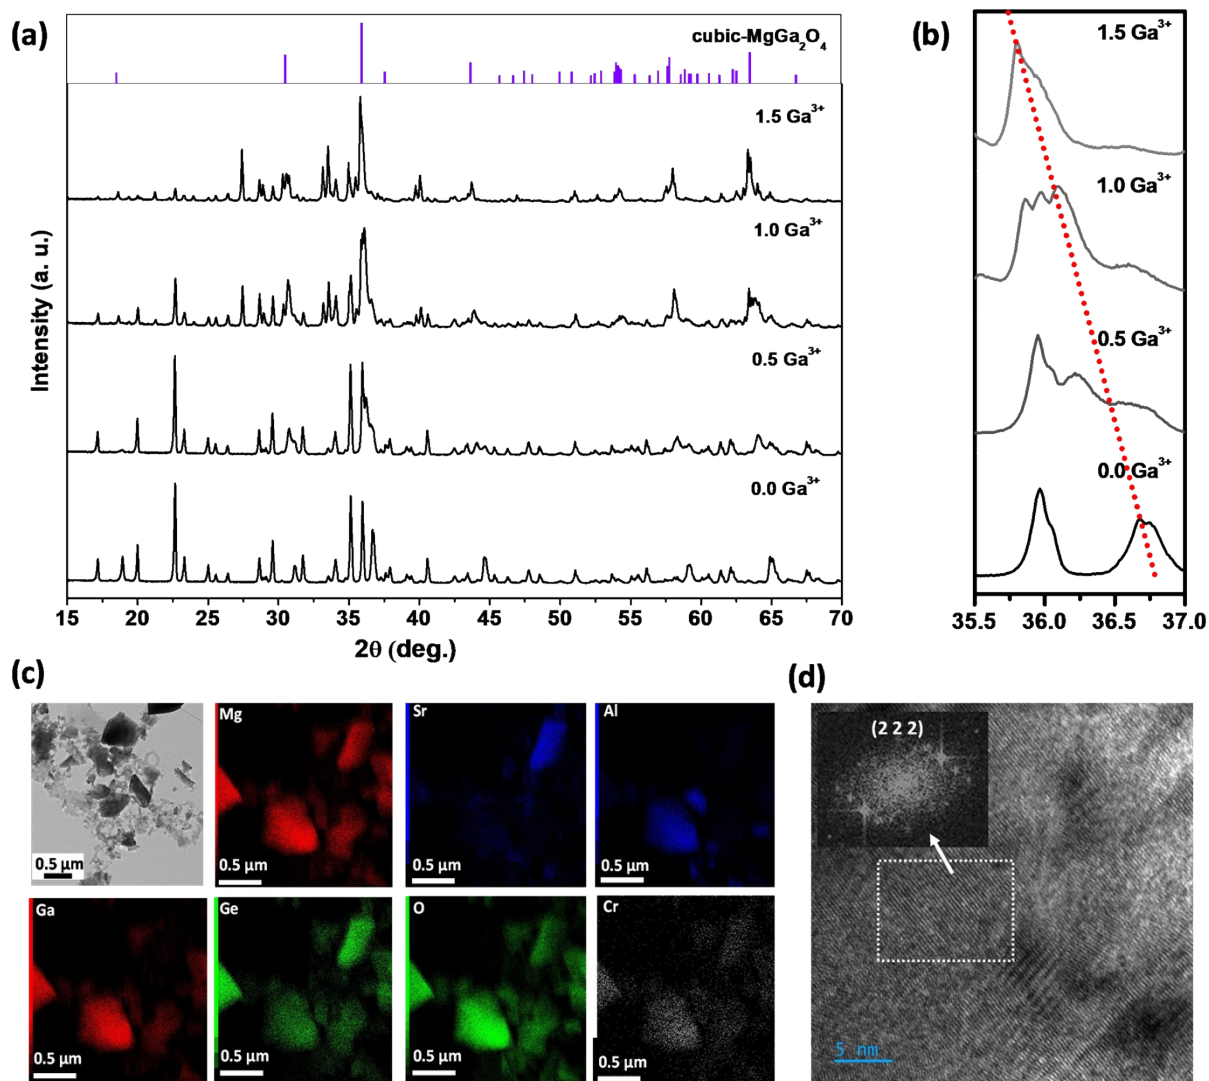

**Figure S8 (a)** Powder XRD patterns of MAG:  $\text{Cr}^{3+}$ ,  $0.1\text{Sr}^{2+}$ ,  $y\text{Ga}^{3+}$  ( $y = 0.0$  to  $1.5$ ) samples and **(b)** enlarged portion of XRD pattern from  $35.5^\circ$  to  $37^\circ$ . **(c)** TEM image and EDX elemental mapping of various elements in MAG:  $\text{Cr}^{3+}$ ,  $0.1\text{Sr}^{2+}$ ,  $1.5\text{Ga}^{3+}$  sample. **(d)** HRTEM image showing the lattice planes of MAG:  $\text{Cr}^{3+}$ ,  $0.1\text{Sr}^{2+}$ ,  $1.5 \text{Ga}^{3+}$  sample and the r-FFT of a small portion.

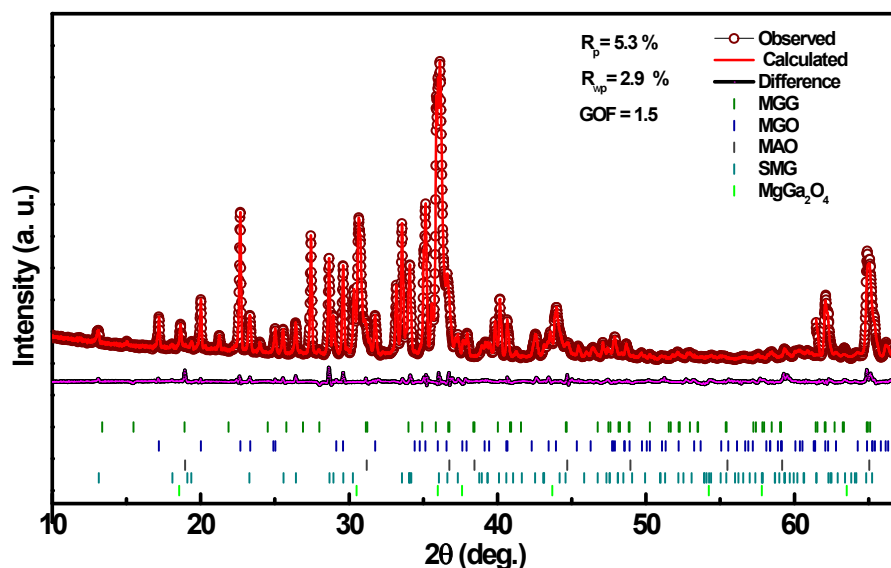

**Figure S9.** Refinement pattern of MAG: Cr<sup>3+</sup>, 0.1Sr<sup>2+</sup>, 1.0 Ga<sup>3+</sup> sample

### Culturing of cells

Hela (Human cervical cancer) cells were procured from National Centre for Cell Sciences (NCCS), Pune. Cells were cultured in Minimum Essential Media (MEM, GIBCO) supplemented with 10% Fetal Bovine Serum (FBS, Gibco) and 1% antibiotic antimycotic solution 100X (with Penicillin, Streptomycin and Amphotericin B-Himedia) and incubated at 5% CO<sub>2</sub> at 37°C in the incubator.

### Assessment of cell viability

Single-cell suspension of HeLa cells was prepared and seeded in the flat bottom 96 well micro titre plates (1×10<sup>4</sup> cells/well) and was kept at 5 % CO<sub>2</sub> & 37 °C for 24 hours. Then, MAG: Cr<sup>3+</sup>, 0.1Sr<sup>2+</sup> phosphor was supplemented to the cells at variable concentrations ranging from 0-100 μM in serum-free culture medium and further incubated for 24 hours. Afterwards, the compound containing the culture medium was removed and the wells were rinsed with PBS. MTT (3-[4,5-dimethylthiazol-2-yl]-2,5-diphenyltetrazolium) reagent (0.5 mg/mL) was prepared in Hanks balanced Salt solution (HBSS) and added to each well including the untreated control wells and kept in dark for 4 hours. The insoluble formazan crystals formed were dissolved in DMSO and the absorbance (Abs) was measured colorimetrically at 570 nm in a multimode plate reader (Synergy H1, Biotek) (2). Percentage cell viability was calculated using the formula.,

$$\% \text{ Cell viability} = [\text{Absorbance of sample} / \text{Absorbance of control}] \times 100$$

### **Cellular internalization studies**

To evaluate the cellular internalization pattern of MAG:  $\text{Cr}^{3+}$ ,  $0.1\text{Sr}^{2+}$  phosphor, HeLa cells were seeded in a flat bottom 96 well plate at a seeding density of  $7 \times 10^3$  cells per well. After 24 hours of incubation, these cells were treated with a non-cytotoxic concentration ( $25 \mu\text{M}$ ) of the compound for 5 hours. Further, the wells were rinsed with PBS and visualised with the red channel filter (TRIT-C) of fluorescent microscope. In order to perform the concentration based internalisation studies, varying concentrations of MAG:  $\text{Cr}^{3+}$ ,  $0.1\text{Sr}^{2+}$  phosphor ( $10$ ,  $25$  and  $50 \mu\text{M}$ ) was added to the cells and incubated for 5 hours, rinsed with PBS and fluorescence images were acquired. Similarly, time dependent internalisation pattern was also recorded by imaging the cells treated with  $25 \mu\text{M}$  of MAG:  $\text{Cr}^{3+}$ ,  $0.1\text{Sr}^{2+}$  phosphor from 1 hour to 5 hours. Fluorescent intensity profile was created using ImageJ software.
